# Supplementary material for: Heterotrophic Sulfur Oxidation of Halomonas titanicae SOB56 and Its Habitat Adaptation to the Hydrothermal Environment
Source: PubMed Central journal article supplement (PMC9237845; doi:10.3389/fmicb.2022.888833), 2022-06-14
Supplement: Data_Sheet_1.pdf [file Data_Sheet_1.pdf]

## *Supplementary Materials*

### SUPPLEMENTARY TABLES

**Supplementary Table 1.** Primer sequences of different genes for RT-qPCR

| Name    | Primer sequences          |
|---------|---------------------------|
| Q4151-F | GTATCGCAGGTTGCTTTGCTTATT  |
| Q4151-R | GAACAGTTTTTCCTGGTAAGCCG   |
| Q4152-F | ATGATGACGTTTGCCAATATGCT   |
| Q4152-R | TGATGCGTGTCTCGTTTTTCCA    |
| RecA-F  | TGAAGTTCTATGCCAGCGTGCG    |
| RecA-R  | TGGCTTTACCTTGACCGATTTTCTT |

**Supplementary Table 4.** Genes related to metal ion metabolism in *H. titanicae* SOB56 (CP059082)

| Metal Element | Encoded gene product                                                                                                                                                                                                                                                                                                                                                                                                               |
|---------------|------------------------------------------------------------------------------------------------------------------------------------------------------------------------------------------------------------------------------------------------------------------------------------------------------------------------------------------------------------------------------------------------------------------------------------|
| Cu            | Copper homeostasis protein CutE<br>Copper resistance protein CopC<br>Copper resistance protein CopD<br>Copper resistance protein CopB<br>Multicopper oxidase                                                                                                                                                                                                                                                                       |
| Fe            | Iron (III) dicitrate transport system permease protein FecD<br>ABC transporter (iron), permease component<br>Iron-chelator utilization protein<br>Iron-regulated protein A precursor<br>Iron-uptake factor PiuB<br>Ferric iron ABC transporter, ATP-binding protein<br>Ferric iron ABC transporter, permease protein<br>Ferroxidase<br>ABC-type Fe <sup>3+</sup> -siderophore transport system, periplasmic iron-binding component |
| Mn            | Manganese ABC transporter, periplasmic-binding protein SitA<br>Manganese ABC transporter, ATP-binding protein SitB<br>Manganese ABC transporter, inner membrane permease protein SitC<br>Manganese ABC transporter, inner membrane permease protein SitD<br>Manganese superoxide dismutase (EC 1.15.1.1)                                                                                                                           |
| As            | Arsenical-resistance protein ACR3<br>Arsenical resistance operon repressor<br>Arsenic resistance protein ArsH<br>Arsenic efflux pump protein                                                                                                                                                                                                                                                                                       |
| Ni            | Nickel responsive regulator NikR                                                                                                                                                                                                                                                                                                                                                                                                   |
| Zn            | Lead, cadmium, zinc and mercury transporting ATPase<br>Zinc uptake regulation protein ZUR<br>Zinc ABC transporter, periplasmic-binding protein ZnuA<br>Zinc ABC transporter, inner membrane permease protein ZnuB<br>Zinc ABC transporter, ATP-binding protein ZnuC<br>Exported zinc metalloprotease YfgC precursor<br>Membrane-associated zinc metalloprotease                                                                    |
| Mg/Co         | Magnesium and cobalt transport protein CorA<br>Magnesium and cobalt efflux protein CorC<br>Cobalt ABC transporter, ATP-binding component CbtL                                                                                                                                                                                                                                                                                      |
| Co-Zn-Cd      | Cobalt-zinc-cadmium resistance protein CzcA; Cation efflux system protein CusA<br>Cobalt-zinc-cadmium resistance protein CzcD                                                                                                                                                                                                                                                                                                      |

|             |                                                                                                                                                                                                                                                                                         |
|-------------|-----------------------------------------------------------------------------------------------------------------------------------------------------------------------------------------------------------------------------------------------------------------------------------------|
| Pb/Cd/Zn/Hg | Lead, cadmium, zinc and mercury transporting ATPase                                                                                                                                                                                                                                     |
| Hg          | Mercuric transport protein, MerE<br>Mercuric resistance operon coregulator<br>Mercuric ion reductase (EC 1.16.1.1)<br>Mercuric transport protein, MerC<br>Periplasmic mercury (+2) binding protein<br>Mercuric transport protein, MerT<br>Mercuric resistance operon regulatory protein |
| Mo          | Molybdenum ABC transporter, periplasmic molybdenum-binding protein ModA (TC 3.A.1.8.1)<br>Molybdenum transport system permease protein ModB (TC 3.A.1.8.1)<br>Molybdenum transport ATP-binding protein ModC (TC 3.A.1.8.1)<br>Putative molybdenum transport ATP-binding protein modF    |
| Others      | Metal transporter, ZIP family<br>Heavy metal sensor histidine kinase                                                                                                                                                                                                                    |

## SUPPLEMENTARY FIGURES

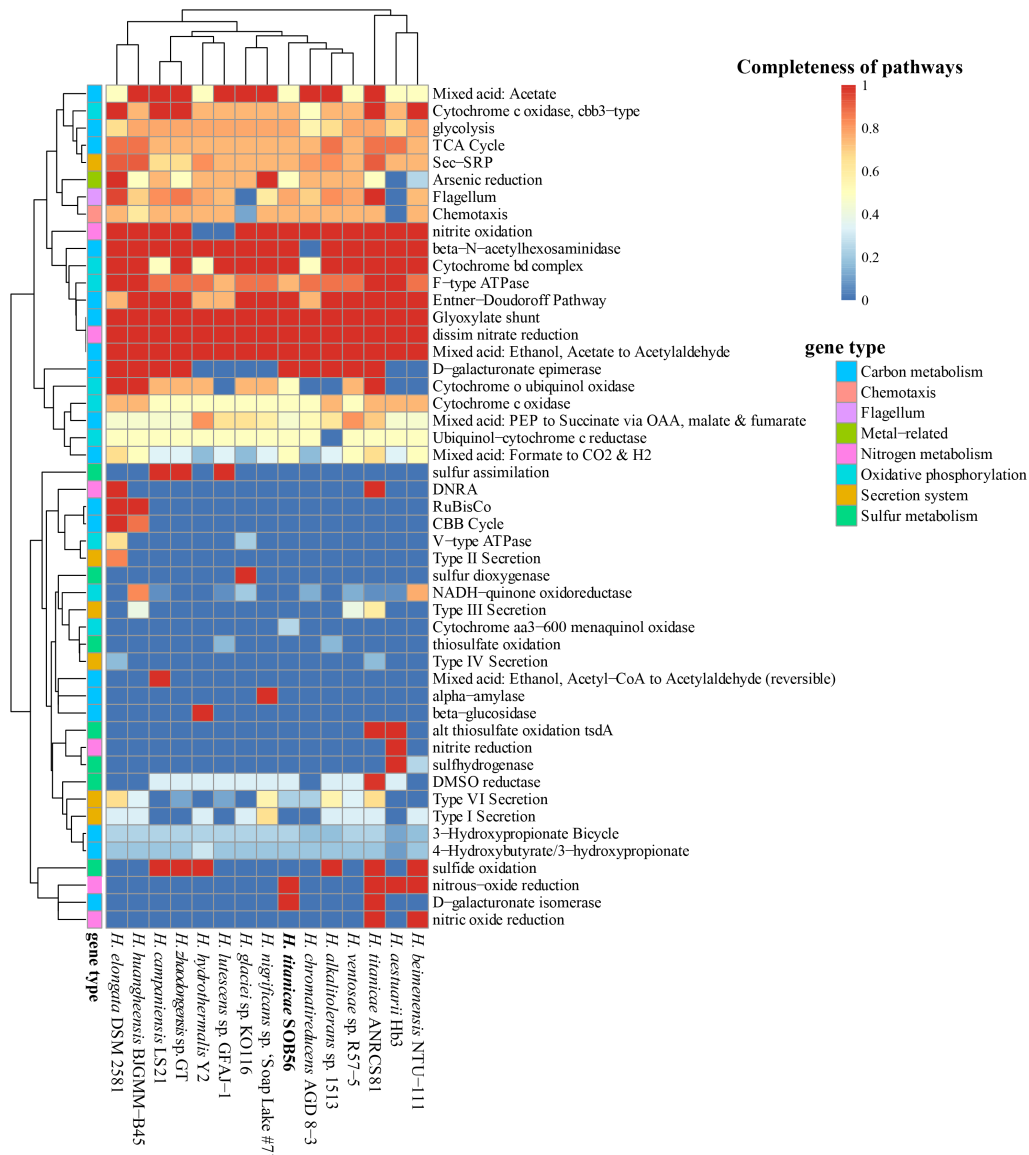

**Supplementary Figure 1.** KEGG annotation results for fifteen *Halomonas* genomes. Categories of pathways are presented at left side of heatmap by different colors. Color of each cell refers to completeness of enzymes involved in each pathway.

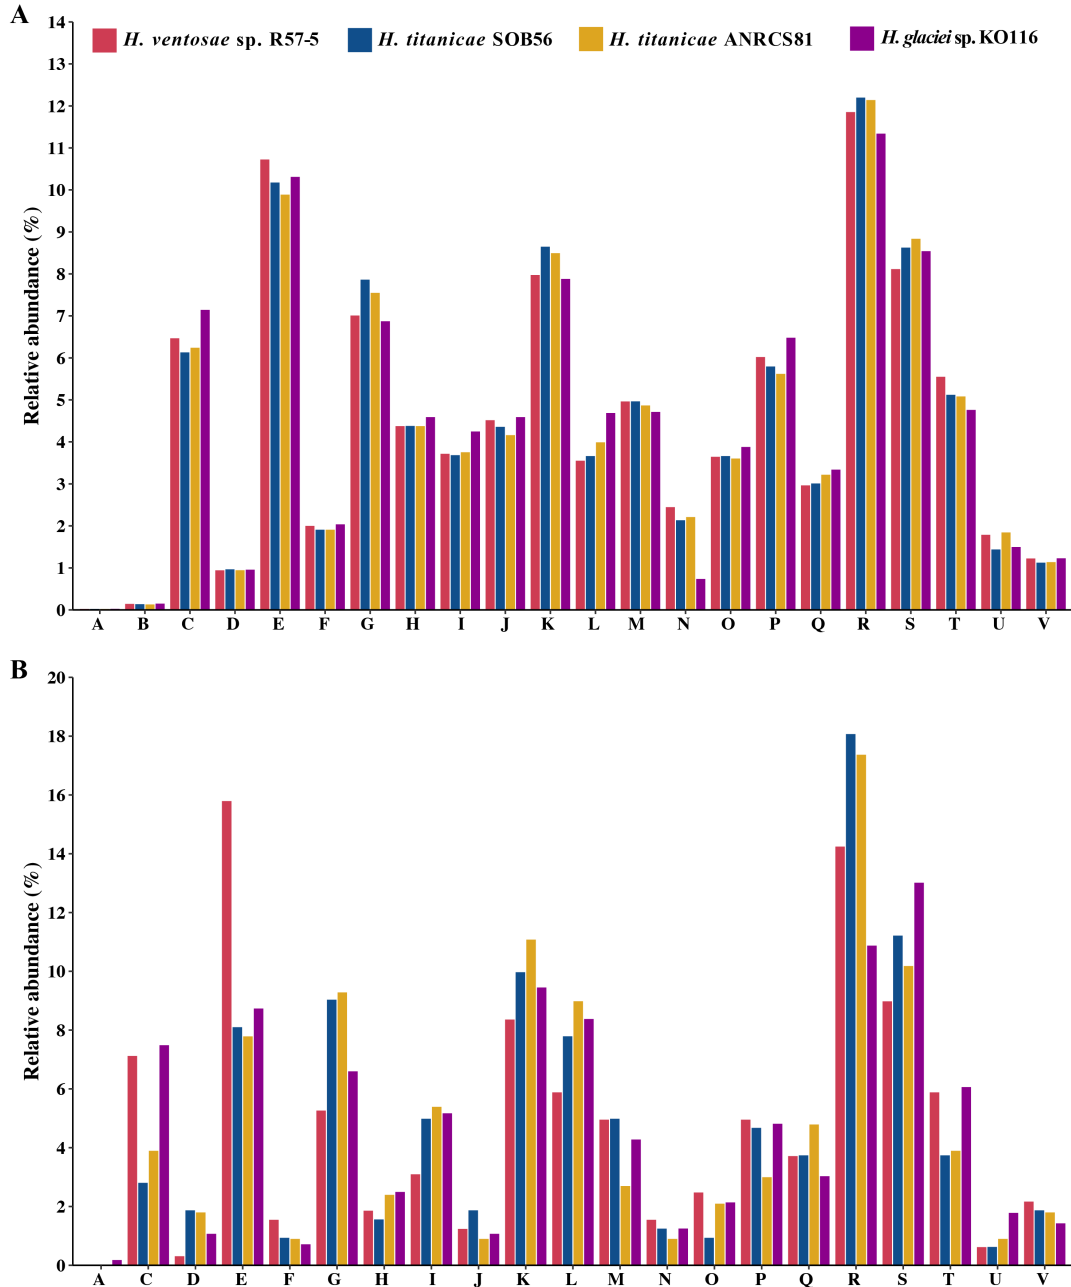

**Supplementary Figure 2.** Comparison of functional genes in four *Halomonas* genomes. **A** Total gene annotation. **B** Species-specific genes annotation of each strain. Designations of functional categories: A, RNA processing and modification; B, chromatin structure and dynamics; C, energy production and conversion; D, cell cycle control, cell division, chromosome partitioning; E, amino acid transport and metabolism; F, nucleotide transport and metabolism; G, carbohydrate transport and metabolism; H, coenzyme transport and metabolism; I, lipid transport and metabolism; J, translation, ribosomal structure and biogenesis; K, transcription; L, replication, recombination and repair; M, cell wall/membrane/envelope biogenesis; N, cell motility; O, posttranslational modification, protein turnover, chaperones; P, inorganic ion transport and metabolism; Q, secondary metabolites biosynthesis, transport and catabolism; R, general function prediction only; S, function unknown; T, signal

transduction mechanisms; U, intracellular trafficking, secretion, and vesicular transport; V, defense mechanisms; W, extracellular structures.

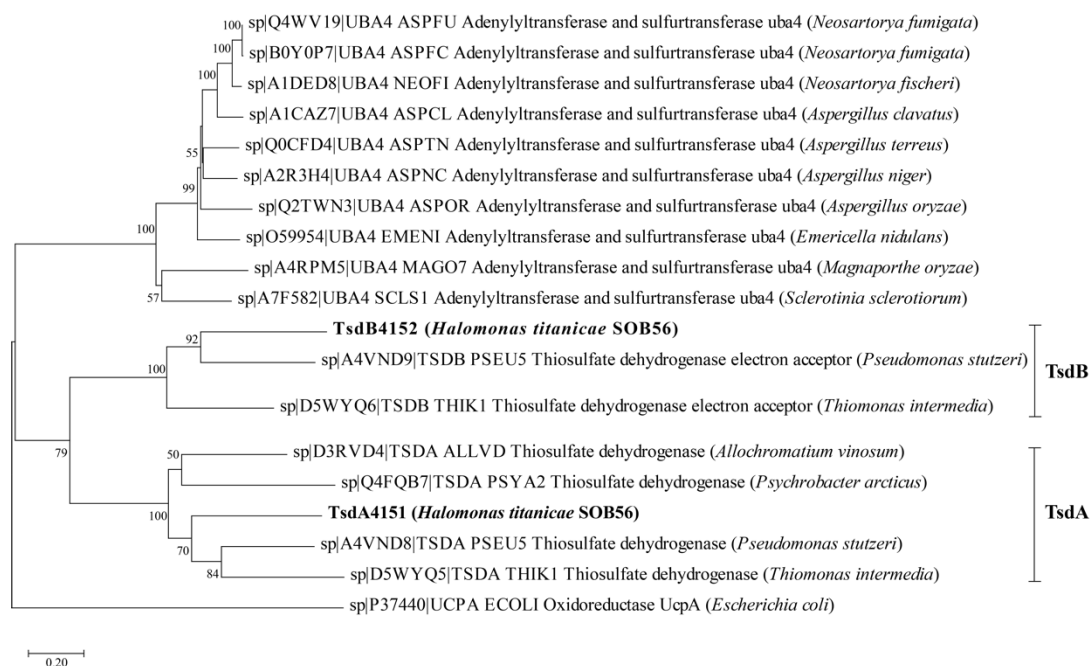

**Supplementary Figure 3.** Neighbor-joining phylogenetic tree of TsdA4151, TsdB4152 and homologous proteins. Percentage bootstrap values above 50% (1000 replicates) are shown at branch nodes.

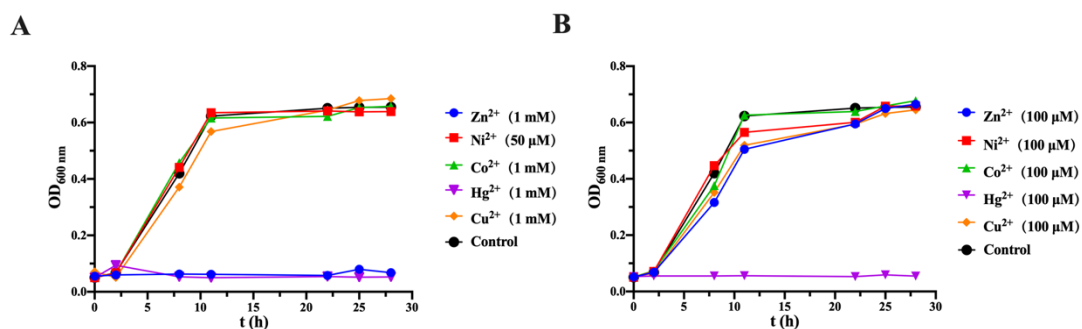

**Supplementary Figure 4.** The growth course of *H. titanicae* SOB56 under different concentrations of metal ions.

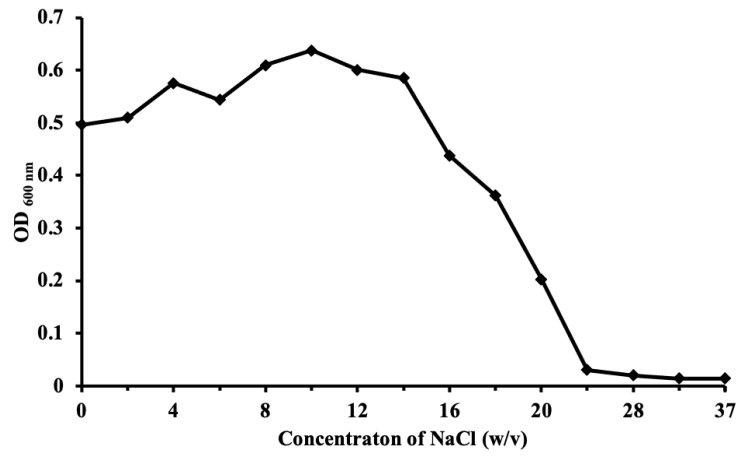

**Supplementary Figure 5.** Sodium ion tolerance of *H. titanicae* SOB56.
